# Supplementary material for: COX5B-Mediated Bioenergetic Alterations Modulate Cell Growth and Anticancer Drug Susceptibility by Orchestrating Claudin-2 Expression in Colorectal Cancers
Source: MDPI journal article supplement (doi:10.3390/biomedicines10010060), 2021-12-28
Supplement: s1 [file s1]

Supplementary information  
Supplementary Figures

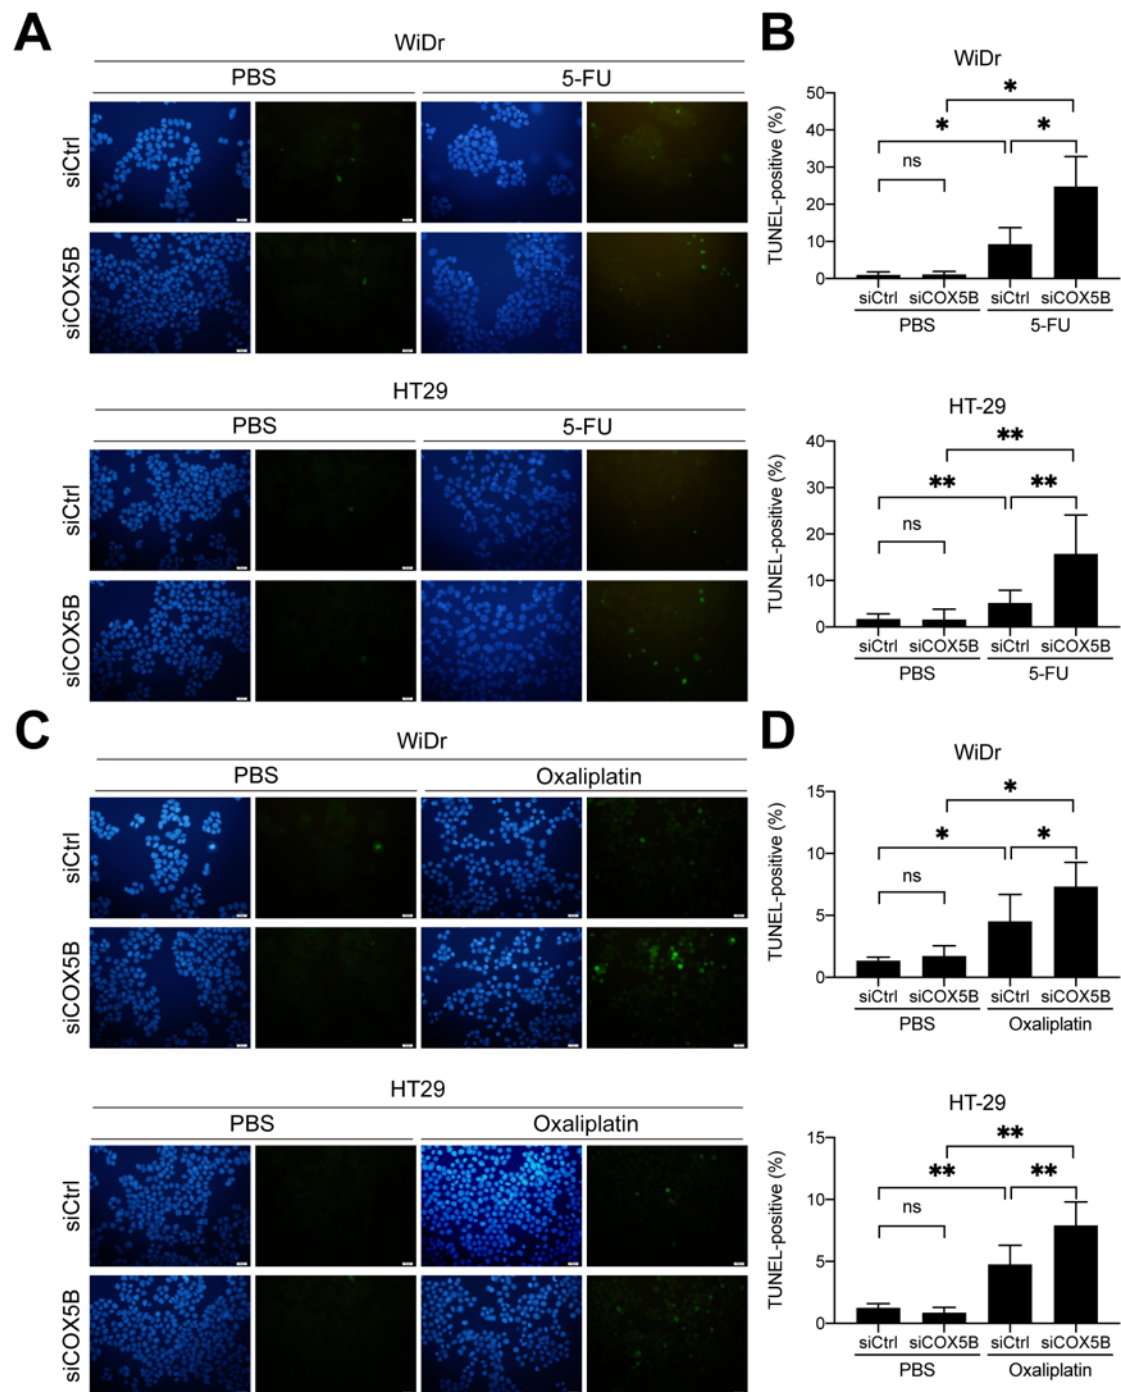

**Figure S1.** Silencing COX5B sensitized CRCs cells to anticancer drugs through enhancing programmed cell-death pathway. (A) The representative images showed the TUNEL-positive cells after with or without treatment of 1 mg/mL 5-FU. The quantification results are showed in (B). (C) The representative images showed the TUNEL-positive cells after with or without treatment of 100 mg/L Oxaliplatin. The

quantification results are showed in (D). \*,  $P < 0.05$ ; \*\*,  $P < 0.01$ . All the  $P$  values were acquired by two-tailed paired student  $t$ -test.

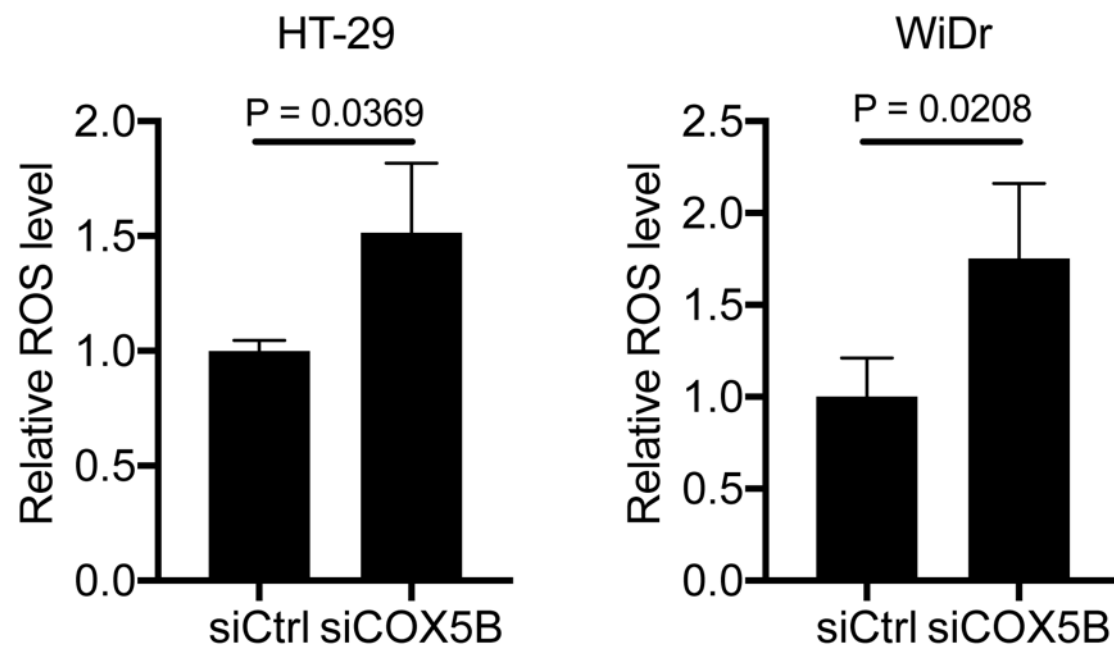

**Figure S2.** Silencing COX5B accumulates ROS in CRCs cells. The ROS in CRCs under depletion of COX5B was determined. The  $P$  values were acquired by two-tailed unpaired student  $t$ -test.

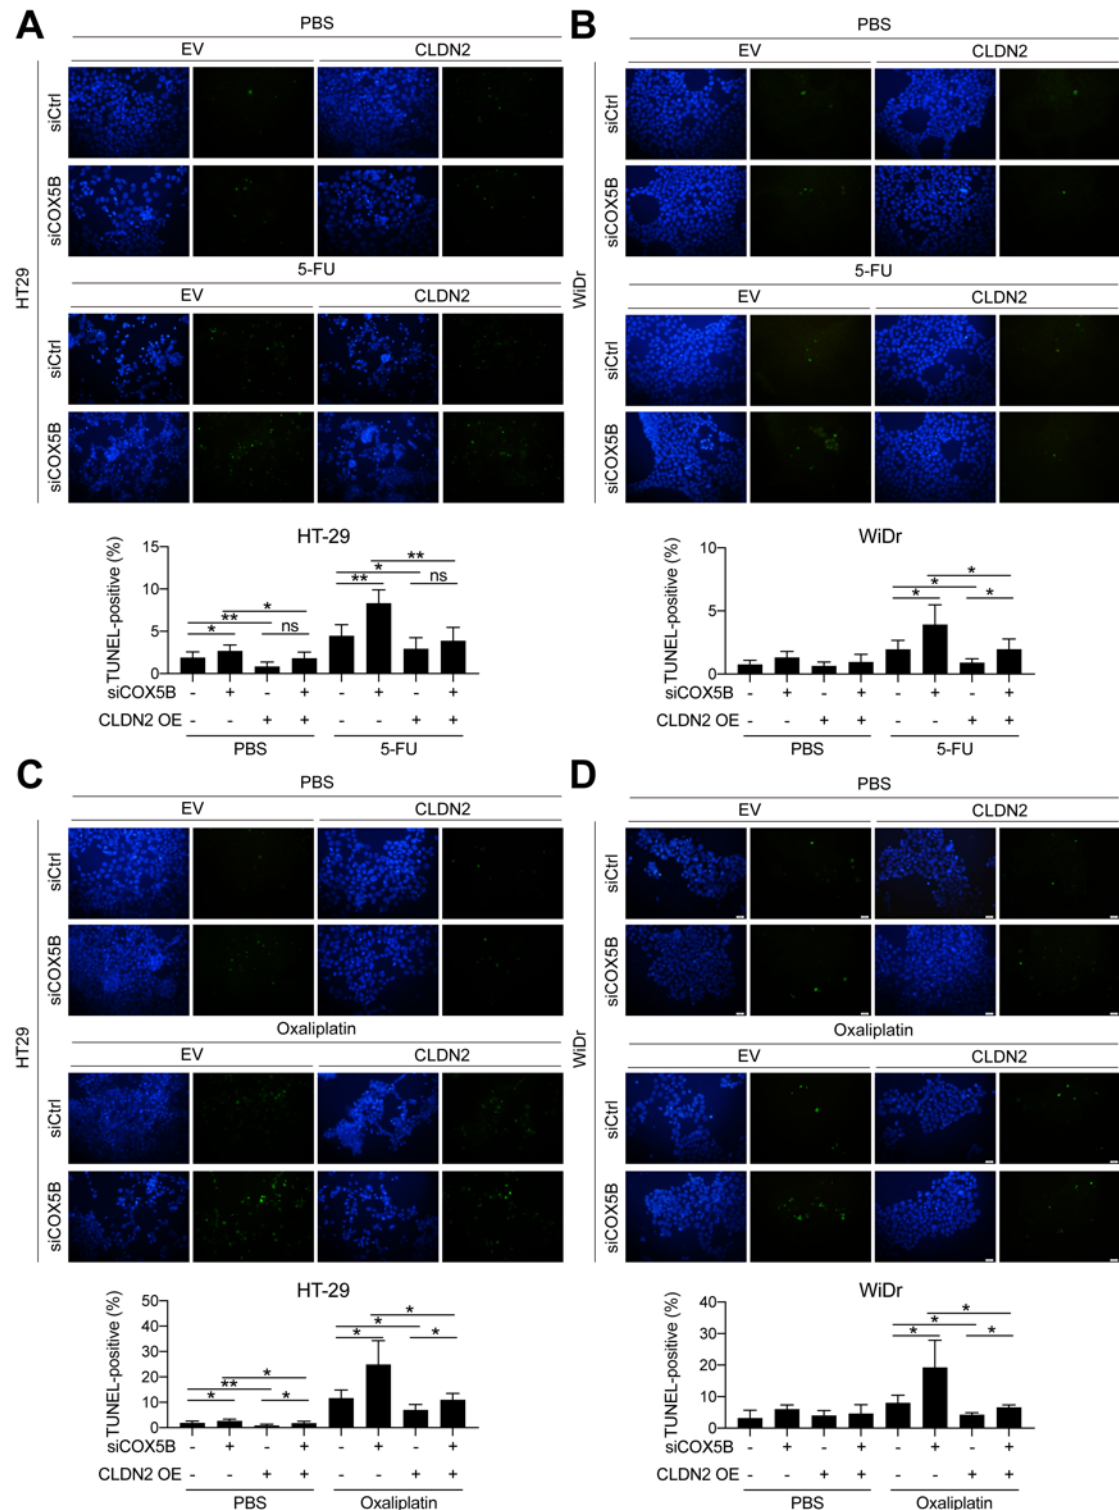

**Figure S3.** CLDN2 works downstream of COX5B-induced bioenergetic alteration to modulate susceptibility to anticancer drugs in CRCs cells through enhancing programmed cell-death pathway. (A and B) The representative images showed the TUNEL-positive cells under indicated treatments after with or without treatment of 1 mg/mL 5-FU. The quantification results are showed in the lower panels. (C and D) The

representative images showed the TUNEL-positive cells under indicated treatments after with or without treatment of 100 mg/L Oxaliplatin. The quantification results are showed in the lower panels. \*,  $P < 0.05$ ; \*\*,  $P < 0.01$ ; ns, no significance. All the P values were acquired by two-tailed paired student *t*-test.

## Supplementary Tables

**Table S1.** Primers used in this study.

| Name             | Sequence (5'-3')          |
|------------------|---------------------------|
| VCAN qPCR F      | ACCACGCTTCCTATGTGAC       |
| VCAN qPCR R      | TGAACATCTTGGCCTTGGA       |
| GDAP1 qPCR F     | ACGACTTAAATCAAAGCTGC      |
| GDAP1 qPCR R     | TCCAAGACTTTCTCCAACCTC     |
| MOB1A qPCR F     | TGGGAATCTGAGACAAGCTG      |
| MOB1A qPCR R     | AAGAAATCCACAGTGTTACACAG   |
| CLDN2 qPCR F     | GCAAGGTCTTCTAGATGCC       |
| CLDN2 qPCR R     | TGTAGCCCACAAGTTGGAG       |
| SERPINB8 qPCR F  | CGTGTGATTTTCCTTCCAGAC     |
| SERPINB8 qPCR R  | GAAATCTTACCTTCAGTCTTCTCTG |
| LONRF2 qPCR F    | TTAAAGGCTCAGGGTCACAG      |
| LONRF2 qPCR R    | AGATGAATTCTCCGAGCTCC      |
| DARS-AS1 qPCR F  | CAAAGCAAGACCCTGTGTC       |
| DARS-AS1 qPCR R  | ATTCCATGTCTTGGTCTCCC      |
| LINC01410 qPCR F | GCTCTGCTCAGGATTTGTC       |
| LINC01410 qPCR R | ACTAGCATCAACACCATCCA      |
| GLIDR qPCR F     | AGAAAGCTGAGACTCAGGG       |
| GLIDR qPCR R     | GTTTGGGATCGAGATCTGC       |
| BTN3A1 qPCR F    | CAACTTTCGTGTCTGCCTC       |
| BTN3A1 qPCR R    | ATGGTCTCTGCACTCATGG       |
| BTN3A2 qPCR F    | TGACAGTGGAAGTACTTGTG      |
| BTN3A2 qPCR R    | GATTAGAACCCAGTGCTGC       |
| MSMO1 qPCR F     | CTGCATAGACTCTTACACCAC     |
| MSMO1 qPCR R     | CCATTCCAAATGGAGCCTG       |
| PIK3IP1 qPCR F   | ATCTGGAGGCTGTTTCTGG       |
| PIK3IP1 qPCR R   | CAGTAACTGTGATTGCCGG       |
| TRIM16L qPCR F   | GATGGAGAAGAGTAAGCAGG      |

|                 |                          |
|-----------------|--------------------------|
| TRIM16L qPCR R  | AACTTGCAGTACTCCTCCA      |
| AOC2 qPCR F     | TCTTAGGAGAGGATCTGGTG     |
| AOC2 qPCR R     | TCACTGTGTTTGGGATGTC      |
| SEMA7A qPCR F   | GATACTGTCATGCAGAACCC     |
| SEMA7A qPCR R   | GTAGTAGATCTTGTCATCGTAAGC |
| ITPR1 qPCR F    | TGCTTTATCTGTGGCTTGG      |
| ITPR1 qPCR R    | GTTGTGTTCTTCCTTGATGTG    |
| FAM46C qPCR F   | CTTCTATTGCCCAGTTTCCC     |
| FAM46C qPCR R   | GAAGGACATGCAATCCCTG      |
| ALDH1A3 qPCR F  | CTACTCTGAGTTTGTGAGGC     |
| ALDH1A3 qPCR R  | TTTGATCAATCTGAGGCCC      |
| FAM114A1 qPCR F | TGACAAACTCAATAAGGCCA     |
| FAM114A1 qPCR R | TTTGCCACATCTACTGACAC     |
| AMY2B qPCR F    | CTCCCAAGGGATTTGGAGG      |
| AMY2B qPCR R    | TGAAAGGGTTGTGAATTGCA     |
| ACTB qPCR F     | CACCAACTGGGACGACATGG     |
| ACTB qPCR R     | AGGATCTTCAGAGGTAGTC      |
| COX5B qPCR F    | GACCCATACAATGTACTG       |
| COX5B qPCR R    | CAGCCTACTATTCTCTTG       |

---

**Table S2. Baseline data for CRCs patients included in this study.**

| Variable                                           | Patients included for in assay |                         | P            |
|----------------------------------------------------|--------------------------------|-------------------------|--------------|
|                                                    | COX5B T < N<br>(n = 86)        | COX5B T ≥ N<br>(n = 40) |              |
| Gender, male, n (%)                                | 39 (45.3%)                     | 24 (60.5%)              | 0.180        |
| Age, years, mean ± SD                              | 66.0 ± 11.0                    | 63.0 ± 13.4             | 0.236        |
| Height, cm, mean ± SD                              | 156.7 ± 7.4                    | 160.5 ± 8.4             | <b>0.021</b> |
| Weight, kg, mean ± SD                              | 58.6 ± 10.1                    | 61.3 ± 8.8              | 0.214        |
| BMI, mean ± SD                                     | 23.9 ± 4.1                     | 23.4 ± 3.1              | 0.530        |
| Tumor location, Left-handed, n (%)                 | 67 (77.9%)                     | 21 (52.5%)              | <b>0.007</b> |
| Tumor differentiation, Well differentiation, n (%) | 4 (4.7%)                       | 8 (20.0%)               | <b>0.016</b> |
| Local invasion, pT1 + pT2, n (%)                   | 21 (24.4%)                     | 8 (20.0%)               | 0.748        |
| Maximum tumor size, mm, mean ± SD                  | 20.1 ± 15.4                    | 46.7 ± 173.7            | 0.766        |
| CEA, ng/mL, median (range)                         | 2.5 (0.5-505.5)                | 2.8 (0.5-1332.0)        | 0.375        |
| Adjuvant chemotherapy, n (%)                       | 42 (48.8%)                     | 20 (50.0%)              | 0.903        |
| Distance to serosa, mm, mean ± SD                  | 4.2 ± 8.3                      | 2.2 ± 3.6               | <b>0.048</b> |
| OCR T/N ratio, mean ± SD                           | 0.9 ± 0.5                      | 1.1 ± 0.6               | <b>0.027</b> |
| ECAR T/N ratio, mean ± SD                          | 1.3 ± 0.7                      | 1.2 ± 0.6               | 0.622        |

Bold values indicate statistical significance  $P < 0.05$ . BMI, body mass index; CEA, carcinoembryonic antigen. Distal colon (left-handed) includes rectum, sigmoid, descending and splenic flexure, while proximal colon (right-handed) contains transverse, hepatic flexure, ascending and cecum.
